1 Recent evolutionary origin and localized diversity hotspots of  
2 mammalian coronaviruses.

3

4 Renan Maestri<sup>a,b,1</sup>, Benoît Perez-Lamarque<sup>a,c,1</sup>, Anna Zhukova<sup>d</sup>, H  l  ne Morlon<sup>a</sup>

5 <sup>a</sup>Institut de Biologie de l'  cole Normale Sup  rieure (IBENS),   cole Normale Sup  rieure, CNRS,  
6 INSERM, Universit   PSL, Paris, France

7 <sup>b</sup>Departamento de Ecologia, Instituto de Bioci  ncias, Universidade Federal do Rio Grande do Sul,  
8 Porto Alegre, RS, Brazil

9 <sup>c</sup>Institut de Syst  matique,   volution, Biodiversit   (ISYEB), Mus  um national d'histoire naturelle,  
10 CNRS, Sorbonne Universit  , EPHE, UA, Paris, France

11 <sup>d</sup>Institut Pasteur, Universit   Paris Cit  , Bioinformatics and Biostatistics Hub, Paris, France

12 <sup>1</sup>R.M. and B.P.-L. contributed equally to this work.

13 \*Corresponding author: Renan Maestri

14 **Email:** [renanmaestri@gmail.com](mailto:renanmaestri@gmail.com)

15 **Author Contributions:** R.M. and H.M. conceived the study; R.M, B.P-L., A.Z. and H.M. designed  
16 and performed the research; B.P-L. and R.M. analyzed the data; R.M, B.P-L., A.Z. and H.M.  
17 wrote the paper.

18 **Competing Interest Statement:** The authors declare no competing interest.

19 **Classification:** Biological Sciences. Evolution.

20 **Keywords:** Paste the keywords here. There should be at least three and no more than five.

21 coronavirus evolution | diversity of coronaviruses | preferential host switches | parasite  
22 diversification

23

## 24 **Abstract**

25 Several coronaviruses infect humans, with three, including the SARS-CoV2, causing diseases.  
26 While coronaviruses are especially prone to induce pandemics, we know little about their  
27 evolutionary history, host-to-host transmissions, and biogeography, which impedes the prediction  
28 of future transmission scenarios. One of the difficulties lies in dating the origination of the family, a  
29 particularly challenging task for RNA viruses in general. Previous cophylogenetic tests of virus-  
30 host associations, including in the Coronaviridae family, have suggested a virus-host  
31 codiversification history stretching many millions of years. Here, we establish a framework for  
32 robustly testing scenarios of ancient origination and codiversification *versus* recent origination  
33 and diversification by host switches. Applied to coronaviruses and their mammalian hosts, our  
34 results support a scenario of recent origination of coronaviruses in bats and diversification by host  
35 switches, with preferential host switches within mammalian orders. Hotspots of coronavirus  
36 diversity, concentrated in East Asia and Europe, are consistent with this scenario of relatively  
37 recent origination and localized host switches. Spillovers from bats to other species are rare, but  
38 have the highest probability to be towards humans than to any other mammal species, implicating  
39 humans as the evolutionary intermediate host. The high host-switching rates within orders, as  
40 well as between humans, domesticated mammals, and non-flying wild mammals, indicates the  
41 potential for rapid additional spreading of coronaviruses across the world. Our results suggest  
42 that the evolutionary history of extant mammalian coronaviruses is recent, and that cases of long-  
43 term virus–host codiversification have been largely over-estimated.

44

45

## 46 **Main Text**

47

### 48 **Introduction**

49

50 Coronaviruses are RNA-viruses of the family Coronaviridae, comprising positive-sense and  
51 single-stranded viruses that have the largest genomes among nidoviruses (1, 2). As several other  
52 RNA viruses, they may cause diseases in humans and other animals (3). Depending on the  
53 taxonomic arrangement, seven (4–6) or eight (7) species of coronaviruses infect humans, three of  
54 which being pathogenic: the SARS-CoV (8, 9), the MERS-CoV (10), and the SARS-CoV2 (11).  
55 The latter is at the origin of the recent COVID-19 pandemic that infected more than 620 million  
56 people and caused the death of more than six and a half million (12). Coronaviruses' high  
57 frequency of recombination (13), broad host range, and high mutation rates (7) make them  
58 especially prone to causing yet future diseases. Nevertheless, their evolutionary history and  
59 biogeography are very poorly understood. Resolving the evolutionary origins of Coronaviridae,  
60 understanding how they diversified, and characterizing their geographic diversity patterns would  
61 facilitate attempts to predict future zoonoses (7, 14, 15).

62

63 Coronaviruses infect mammals, birds, and fish (2), although they predominate in  
64 mammalian species (16–20). A consensus exists on the taxonomic segregation of four genera  
65 within Coronaviridae: Orthocoronavirinae, namely Alpha-, Beta-, Gamma- and Deltacoronavirus  
66 (2, 21). Alpha- and Betacoronaviruses are found exclusively in mammals, while Delta- and  
67 Gammacoronaviruses infect mostly birds but also mammals to a lesser extent (20, 22, 23).  
68 Coronaviruses are most numerous and genetically diversified in mammals (2, 23), in particular  
69 bats, suggesting a mammalian origin in bats (2, 20, 23, 24), although this remains to be tested.

70

71 The timing of origination of the Coronaviridae family is debated, with results that vary by  
72 several orders of magnitude. Woo et al (23) found a recent origin, around 10 thousand years ago.  
73 This dating was obtained by sequencing the well-conserved RNA-dependent RNA-polymerase  
74 (RdRp) genome region of representatives of all four coronavirus genera, and fitting to these

75 sequences a neutral nucleotide-based substitution model with an uncorrelated log-normal relaxed  
76 clock (25) calibrated with serial samples. This calibration provided a mean substitution rate  
77 estimate of  $1.3 \times 10^{-4}$  substitutions per site per year. Wertheim et al. (26) used this estimate and  
78 the same genome region (RdRp), but with a codon-based substitution model accounting for the  
79 effect of selection. Indeed, purifying selection can lead to an underestimation of viral origins when  
80 not accounted for (26, 27). They found an ancient origin, around 293 (95% confidence interval,  
81 190 to 489) million years ago (26). More recently, Hayman & Knox (28) obtained similar results,  
82 but using the splitting times of hosts as constraints, therefore assuming a priori that coronaviruses  
83 codiversified with their hosts.

84  
85 More generally, dating the phylogenies of RNA virus families is a difficult task (29). While  
86 for some of them dated calibration points can be used, based on orthologous copies of  
87 endogenous virus elements (EVEs) present in the genomes of related mammalian species with  
88 known times of divergence (30), in many others, including in the Coronaviridae, such elements  
89 have not been found (31). Despite the difficulty in dating viral families, it has been proposed, from  
90 cophylogenetic analyses investigating the congruence of the host and viral phylogenetic trees  
91 (32), that vertebrate-associated RNA viruses have codiversified with their hosts over hundreds of  
92 millions of years (31, 33). Indeed, RNA virus phylogenies tend to mirror that of their hosts; for  
93 example, closely-related coronaviruses infect closely-related mammals (e.g. (28)). However, a  
94 major caveat is that such cophylogenetic signals can emerge when viruses diversify by host  
95 switches preferentially occurring among closely-related hosts, in the absence of any cospeciation  
96 event (34). Event-based cophylogenetic methods can in principle identify cospeciation and host  
97 switches events (32, 34), but their behavior in the presence of diversification by preferential host  
98 switches is not well understood. Under a perfect codiversification scenario, host and symbiont  
99 phylogenies would be identical. Events of host switches, duplications and losses induce  
100 mismatches, and cophylogenetic methods aim to identify parsimonious sets of events that allow  
101 “reconciling” the two phylogenies (34, 35). However, most of these methods rely entirely on tree  
102 topology (and not branching times), such that time-inconsistent host switches between non-  
103 contemporary host lineages are allowed during the reconciliation. In the presence of preferential  
104 host switches, these methods may thus favor biologically unrealistic reconciliations that involve  
105 cospeciation events and ‘back-in-time’ host switches to reconciliations that involve more frequent  
106 contemporary host switches. This would have remained unnoticed, unless users of the methods  
107 specifically looked at the time consistency of the inferred host switches, which is usually not done.

108  
109 Here, we establish a framework for testing scenarios of ancient origination and  
110 codiversification versus recent origination and diversification by host switches that combines  
111 probabilistic cophylogenetic models and biogeographic analyses (Fig 1). We then apply this  
112 framework to the Coronaviridae-mammals association. We assemble a dataset of all mammalian  
113 hosts of coronaviruses and a complete association matrix between host species and species-like  
114 Operational Taxonomic Units (sOTUs) of coronaviruses, as well as geographic repartition of  
115 Coronaviridae and their mammalian hosts. We construct a new Coronaviridae tree based on a  
116 recent proposition for the use of a well-conserved region of their RNA genome (36, 37). Under the  
117 ancient origination scenario (Fig 1A), long-term vertical transmission of Coronaviridae within  
118 mammalian lineages could lead to events of mammal-coronavirus cospeciations. Coronaviruses’  
119 diversification would then be modulated by both cospeciations and horizontal host switches from  
120 one mammalian lineage to another (26, 31). The most recent common ancestor of coronaviruses  
121 could even have infected the most recent common ancestor of mammals and birds (26). Under  
122 the recent origination scenario (Fig 1B), codiversification with hosts is virtually impossible, and  
123 coronaviruses’ diversification would then be largely dominated by recent host switches.  
124 Expectations for the output of reconciliation and biogeographic analyses under these different  
125 scenarios, as well as a scenario of random associations, are explicated in Fig 1. We identify the  
126 likely origination of coronaviruses in the mammalian tree, quantify the frequency of cospeciation  
127 and host-switching events, and locate these host switches, therefore identifying ‘reservoirs’ of  
128 Coronaviridae and potential transmission routes across mammals.

129

## 130 Results

131

132 By screening the 46 sOTUs of Coronaviridae identified by Edgar et al. (36) in public databases,  
133 we found 35 that were associated with mammalian hosts. Our trees of these 35 sOTUs support a  
134 well-defined split between Alphacoronaviruses and the other genera, regardless of the  
135 phylogenetic method used (Fig 2; *SI Appendix*, Fig. S1). Overall, Alphacoronaviruses form a  
136 monophyletic clade, Delta- and Gammacoronaviruses form sister clades, with the main  
137 uncertainty being on the placement of their ancestor in relation to Beta (i.e. as a sister to a  
138 monophyletic Beta-clade (Fig. 2) or within the Beta-clade (*SI Appendix*, Fig. S1).

139

140 We found that mammalian hosts of coronaviruses belong to 31 families and 10 orders of  
141 mammals, and are widely distributed throughout the mammalian phylogeny (*SI Appendix*, Fig.  
142 S2). Most mammalian hosts are bats (Chiroptera - 55 species), followed by rodents (Rodentia -  
143 22 species), artiodactyls (Artiodactyla - 15 species), carnivores (Carnivora - 11 species), and  
144 primates (Primates - 5 species). Five other orders have at least one representative species:  
145 Eulipotyphla (4), Lagomorpha (1), Perissodactyla (1), Pholidota (1), and Sirenia (1). The number  
146 of mammalian hosts per coronavirus' sOTU varies across the Coronaviridae tree, ranging from 1  
147 to 22 species, with an average of 4.94 (Fig. 2). Of the 35 sOTUs, 23 are found in at least one bat  
148 species and 17, mostly in alphacoronaviruses, are found exclusively in bats (Fig. 2). Eight sOTUs  
149 are found in humans, six of which, including the three pathogenetic sOTUs, are  
150 betacoronaviruses. Betacoronaviruses infect a larger average number of hosts and a larger  
151 diversity of non-bat species than Alphacoronaviruses. Twenty-two coronaviruses occur in more  
152 than one species; of those, 11 are found in multiple orders (Fig. 2; *SI Appendix*, Fig. S3) and 11  
153 in multiple species of a single order (*SI Appendix*, Fig. S3).

154

155 We first tested whether closely-related coronaviruses tend to infect closely-related  
156 mammals. A negative answer to this question would suggest that the diversification of  
157 Coronaviridae is independent of mammalian history, excluding the scenarios of codiversification  
158 or diversification per preferential host switches (Fig. 1). To the contrary, we found a significant  
159 phylogenetic signal for the overall association between coronaviruses and mammals (Mantel test:  
160  $r = 0.38$ ;  $P = 0.0001$ ) and vice-versa ( $r = 0.29$ ;  $P = 0.0001$ ), after accounting for the confounding  
161 phylogenetic signal in the number of partners (38). Mantel tests across sub-clades of both  
162 phylogenies revealed that this overall phylogenetic signal is linked to phylogenetic signal in the  
163 deep nodes of the Coronaviridae and mammal phylogenies rather than at shallow phylogenetic  
164 scales (*SI Appendix*, Fig. S4). This pattern could arise from ancient codiversification followed by  
165 un-preferential host switches, or from recent host switches preferentially occurring between hosts  
166 from the same high-level taxonomic grouping (such as mammalian orders). We also found that  
167 closely related coronaviruses tend to infect a similar number of hosts ( $r = 0.29$ ;  $P = 0.002$ ), while  
168 closely related mammals do not tend to host a similar number of distinct coronaviruses ( $r = 0.04$ ,  
169  $P = 0.1$ ), suggesting that coronaviruses' specificity towards hosts is evolutionarily conserved while  
170 hosts' susceptibility to coronaviruses is not.

171

172 To further investigate the hypotheses of ancient codiversification versus recent host  
173 switches, we used a probabilistic cophylogenetic model, the amalgamated likelihood estimation  
174 (ALE - (39)), that reconciliates the host and symbiont phylogenies using events of cospeciations,  
175 host switches, duplications, or losses, while accounting for phylogenetic uncertainty in the  
176 symbiont phylogenies and undersampling of the host species (35, 39, 40). The main version of  
177 ALE we used is an "undated" version that accounts for topology but not branch lengths, as the  
178 dated version did not perform well on our data (see Methods). Time-inconsistent host switches  
179 are thus allowed during the reconciliation. If the scenario of ancient diversification holds, we  
180 expect to find reconciliations requiring more cospeciations and fewer host switches than expected  
181 under a scenario of independent evolution (hereafter referred to as 'significant reconciliation'),

182 and few time-inconsistent switches (Fig. 1A). Under the alternative scenario of recent origination  
183 and diversification by preferential host switches, we also expect to infer a significant reconciliation,  
184 but with many time-inconsistent switches, as the algorithm tends to explain the cophylogenetic  
185 signal in the interactions by cospeciation events (Fig. 1B). We indeed found a significant  
186 reconciliation between the Coronaviridae and the mammalian trees, confirming the non-  
187 independence of their evolution, which we evaluated by randomly shuffling mammal species  
188 across the full tree or within biogeographic regions (*SI Appendix*, Fig. S7). ALE reconciliations  
189 inferred average numbers of 145 cospeciations, 65 losses, 0 duplication, and 92 host switches.  
190 Without investigating the time-consistency of the host switches, we would conclude that there are  
191 almost 1.5 more diversification events of Coronaviridae that are related to ancient  
192 codiversification rather than host switches. However, on average 20% of the inferred host  
193 switches are time-inconsistent, including “back-in-time” host switches of >50 Myr (*SI Appendix*,  
194 Fig. S8), which suggests instead that extant Coronaviridae originated recently and diversified by  
195 frequent preferential host switches. 64% of the reconciliations found an origination of  
196 coronaviruses within bats, in particular within the Pteropodidae family (Fig. 2A-C). We no longer  
197 found an origination in bats when randomly shuffling the dataset (*SI Appendix*, Fig. S5,S6),  
198 suggesting that this result is not artifactual. We checked the interpretation of our results by  
199 simulating the two scenarios of (i) ancient origination in the ancestors of bats followed by  
200 codiversification and (ii) recent origination in an extant bat species and a subsequent  
201 diversification by preferential host switches. On the first set of simulations, ALE correctly inferred  
202 an origination in bats and a few time-inconsistent switches (*SI Appendix*, Fig. S12). On the  
203 second set, ALE correctly inferred an origination in bats, although with lower confidence, and a  
204 large fraction (~20%) of time-inconsistent host switches, similar to what we observed for  
205 Coronaviridae. These results therefore indicate a scenario of recent origination of coronaviruses  
206 in bats followed by diversification by preferential host switches.

207  
208 To investigate this scenario in more detail, we gradually applied a tree transformation to  
209 the mammalian phylogeny, which excludes the possibility of an ancient origination happening  
210 earlier than a given time. We found that we had to impose a very recent time of origination  
211 (younger than 5 Myr) to obtain few time-inconsistent switches (*SI Appendix*, Table S1). We thus  
212 carried out our follow-up analyses with a mammals’ tree transformation (star phylogeny) that  
213 assumes an origination in an extant mammalian lineage, such that coronavirus diversification is  
214 explained entirely by host switches between extant mammalian species. Simulations validated  
215 this approach in terms of properly inferring originations and identifying preferential host switches  
216 (*SI Appendix*, Fig. S13). Applied to the data, the approach inferred a high probability of origination  
217 in bats (56%, Fig. 2B-C, *SI Appendix*, Fig. S6) and a scenario of diversification by preferential  
218 host switches: 68% of the inferred host switches happened within mammal orders (Fig 2D, *SI*  
219 *Appendix*, Fig. S10), whereas we would expect on average only 28% of within-order host  
220 switches if happening at random. We also inferred more-than-expected host switches between  
221 closely related mammal orders (e.g. between Artiodactyla and Perissodactyla) and between the  
222 order containing humans (Primates) and those of their domesticated animals, such as  
223 Artiodactyla and Carnivora (*SI Appendix*, Fig. S10, Table S2). In contrast, host switches were five  
224 times less numerous than expected by chance between bats and other orders (10.7%, against  
225 50.2% on average if host switches were randomly distributed, Fig. 2D), in particular Artiodactyla  
226 and Rodentia (*SI Appendix*, Fig. S11, Table S2). When occurring, host switches from bats often  
227 occurred toward humans (1.9 host switches per reconciliation on average) or toward urban-living  
228 and/or domesticated animals, such as rats, camels, or pigs (>1 host switch on average; *SI*  
229 *Appendix*, Table S3). Host switches to humans occurred mostly from domesticated mammals  
230 (camels, pigs, dogs), the house shrew and the house mouse, then followed by Asian palm civets,  
231 and lastly by bats and other rodents (*SI Appendix*, Table S4). Results were consistent when  
232 subsampling the dataset to have an equal sampling effort per host species, suggesting that our  
233 results are not artifactually explained by the enhanced monitoring of coronaviruses in humans or  
234 domesticated animals (*SI Appendix*, Supplementary Information Text). Finally, we found that  
235 some sOTUs, in particular from Betacoronaviruses (e.g. u24667 and u175, both with humans

236 among their hosts), have experienced frequent host switches, whereas others have not (e.g.  
237 u165, which is restricted to pigs). In particular, u944 (SARS-Cov-2) has experienced an  
238 intermediate number of host switches compared to other coronaviruses (*SI Appendix*, Fig. S9).

239  
240 We found qualitatively similar results when applying ALE on different sub-parts of the  
241 palmprint region, suggesting that the potential occurrence of recombination does not bias our  
242 conclusions (*SI Appendix*, Table S5). The percentage of originations inferred to occur in bats  
243 decreased in the analyses on the first sub-part, probably because using such a short fragment  
244 (75 aa-long) does not allow robust reconciliations. We also obtained consistent results using a  
245 reconciliation method based on maximum parsimony (eMPress) instead of maximum likelihood  
246 (ALE). Whatever the costs that we set for the different reconciliation events, eMPress estimated  
247 significant reconciliations ( $p$ -values $<0.01$ ). For instance, when favoring host switches, we inferred  
248 a recent origination in bats in 54% of the reconciliations and observed on average 32  
249 cospeciations (s.d. 3), 2 losses (s.d. 1), 0.1 duplication (s.d. 0.3), and 140 host switches  
250 (s.d. 3) including several “back-in-time” host switches of  $>30$  Myr. eMPress therefore also  
251 supports a scenario of recent origination in bats and diversification by preferential host switches  
252 (Fig. 1B). Without investigating the time-consistency of the host switches, we would have wrongly  
253 concluded that almost one fourth of the diversification of Coronaviridae is related to ancient  
254 cospeciation events.

255  
256 An additional piece of evidence for a recent origination scenario comes from the  
257 geographical distribution of coronaviruses, with a hotspot of diversity in Eurasia that has not  
258 colonized the whole world (Fig. 3A, Fig. 1B). The coronavirus’ hotspot is more strongly influenced  
259 by the diversity of alphacoronaviruses than of betacoronaviruses (*SI Appendix*, Fig. S14). The  
260 higher host switches rates and broader host range of betacoronaviruses is reflected in a more  
261 widespread geographic distribution, with less pronounced hotspots when compared to  
262 alphacoronaviruses (*SI Appendix*, Fig. S14). Mammalian hosts of coronaviruses have a hotspot  
263 of species diversity concentrated in East Asia (Fig. 3C). The richness of coronaviruses presents a  
264 similar pattern, but with two comparable hotspots of species diversity in East Asia and Southern  
265 Europe (Fig. 3A), suggesting that the European hotspot is composed by fewer host species,  
266 together carrying as diverse a set of coronaviruses as the Asian hotspot. Other regions with a  
267 relatively high richness of coronaviruses and their hosts include parts of the African continent.  
268 The Americas and Australia have relatively low richness of coronaviruses and their hosts.  
269 Phylogenetic diversity of both hosts and coronaviruses (Fig. 3C,D) depict a similar pattern but  
270 with phylogenetic diversity more evenly distributed across most world regions, including the  
271 Americas.

272

## 273 Discussion

274

275 Together, our results suggest that the common ancestor of extant mammalian coronaviruses  
276 originated recently in a bat species, and that coronaviruses diversification occurred via  
277 preferential host switches rather than through codiversification with mammals. Although we  
278 cannot unequivocally reject that ancestors of present-day coronaviruses were not present several  
279 million years ago, we demonstrate that Coronaviridae is a highly dynamic clade in which  
280 diversification operates through host switches at a much faster pace than that of their hosts.  
281 sOTUs are rapidly replaced by newly-generated ones, with little role for codiversification with the  
282 hosts. The high diversity and endemism of coronaviruses among bats has led others to anticipate  
283 that bats might be implicated in the origin of coronaviruses (2, 20, 23, 24), although definitive  
284 proof was lacking. We provided evidence for that hypothesis using a probabilistic cophylogenetic  
285 model after sampling the entire diversity of coronaviruses across mammals. Independent  
286 evidence for coronavirus recent host switches among different species exists in the literature (41,  
287 42). The envisioned scenario suggests a timing of origination for extant Coronaviridae that is  
288 much more recent than the hundreds of millions of years ago suggested by (26). This is not

289 surprising given the difficulties in estimating divergence times and inferring branch lengths for  
290 viral phylogenies (26, 27, 29), and provided that the dating of Wertheim et al. (26) relied on a  
291 substitution rate estimated from data with limited temporal signal (~50 serially sampled  
292 contemporary sequences of a short gene fragment, (23)).

293  
294 Our results contradict previous suggestions that codiversification with vertebrate hosts  
295 played an important role in Coronaviridae diversification (26, 28, 31). They also suggest that  
296 previously reported cases of long-term codiversification in vertebrate RNA viruses have been  
297 largely over-estimated, as many of them may instead be cases of diversification by host switches  
298 occurring preferentially among closely-related hosts. Indeed, these two scenarios both generate  
299 cophylogenetic signal in host-symbionts associations, such that cophylogenetic signal alone is  
300 not evidence for long-term codiversification (34). In addition, under a scenario of recent  
301 origination and preferential host switches, event-based cophylogenetic methods tend to  
302 artifactually favor biologically unrealistic scenarios with codiversification and back-in-time host  
303 switches, as we have shown here. As the time-consistency of host switches is typically not  
304 investigated, this has remained unnoticed, and evidence for codiversification has been taken for  
305 real. Ideally, cophylogenetic reconciliation methods would not allow such time-inconsistent host  
306 switches. However, imposing time constraints in methods based on parsimony is NP-hard (43),  
307 and the 'dated' version of ALE is not well adapted when recent host switch events dominate  
308 evolutionary history. We have found two ways to get around the problem, by interpreting time-  
309 inconsistent host switches as evidence for recent preferential host switches, and by gradually  
310 transforming the host tree to avoid large back-in-time switches, however future efforts should  
311 focus on developing time-consistent cophylogenetic methods. This would allow more robust and  
312 precise inferences of host-virus (and more generally host-symbiont) evolutionary history.

313  
314 During their evolution, coronavirus' host switches occurred more frequently within than  
315 between mammalian orders. This suggests that mammalian characteristics shared between  
316 relatives (e.g., genetic, behavioral, ecological), and the frequency of encounters among hosts  
317 play important roles in determining coronavirus' host switches. Additionally, between-order host  
318 switches occurred more frequently among non-flying mammals and among orders containing  
319 humans and urban and domesticated mammals, suggesting that contact frequency alone is likely  
320 a key characteristic in host switches. Accordingly, amongst the most-likely host switches towards  
321 humans were those coming from mammals suspected to be involved in the transfer of specific  
322 coronavirus sOTUs likely through contact, for instance, camels in the case of MERS-CoV (41),  
323 Asian palm civets with SARS-CoV (16, 17) and the house mouse with SARS-CoV2 (42).  
324 Importantly, we found that host switches from bats to other mammalian species were rare during  
325 the evolutionary history of Coronaviridae, even though coronaviruses originated and are more  
326 diverse within bats. These pieces of evidences suggest that bats are a closed reservoir of the  
327 Coronaviridae diversity.

328  
329 Spillovers from bats to non-bat species, when they occurred, were found more likely to be  
330 towards humans than to any other mammalian species, suggesting humans may have acted as  
331 evolutionary intermediate hosts amongst mammals. From an ecological perspective, the large  
332 abundance and widespread geographic distribution of humans, together with our habits of forcing  
333 contact with other species, including bats, make it unsurprising that humans, among all mammal  
334 species, have acted as intermediate hosts of ancestral forms of coronaviruses. Interestingly, for  
335 some individual species of coronaviruses, such as the SARS-CoV2 and other SARS-like  
336 coronaviruses, the dominant hypothesized scenario is that precursor forms spread from a bat to  
337 another intermediate mammalian host before infecting humans (20, 44). Our molecular marker  
338 lacks the intra-OTU resolution necessary to make species-level predictions, but our results  
339 suggest that more ancient coronaviruses host switches may have occurred in the other direction:  
340 from bats to humans to non-bat mammals. Many human activities lend credit to the human-as-  
341 evolutionarily-intermediate-host-hypothesis, including human excursions to bat caves (45),  
342 hunting (46), and habitat destruction and modification (47), all of which increase the contact

343 between bats and humans and their domesticated animals (47). Conservation of bats' natural  
344 habitats, away from human contact, could help avoiding further spreads of coronaviruses among  
345 humans.

346  
347 Insights of past and future host switches are gained from coronavirus geographic  
348 distribution. Coronaviruses are found worldwide and their hotspots of diversity are concentrated in  
349 East Asia and Southern Europe, where they likely originated. Previous assessments of the  
350 diversity of bat hosts of betacoronaviruses suggested similar hotspots but with a distribution of  
351 coronaviruses more concentrated in the hotspots (7, 14, 15) than the more pervasive pattern we  
352 found using all mammalian hosts. Moreover, the distribution of coronaviruses is less concentrated  
353 in the hotspots when phylogenetic metrics of diversity are included, suggesting that species  
354 richness alone is masking the global evolutionary potential of these viruses (48). Coronaviruses'  
355 likely recent origination in bats, high within-order transmission rates, and their capacity to switch  
356 between mammal orders in some cases suggest the potential for future fast spreading and  
357 increase in the number of species across most world regions. Among alphacoronaviruses, the  
358 spread is more likely to remain concentrated within bats, while betacoronaviruses have a higher  
359 potential for among-orders spreading and infection of new mammalian hosts. The  
360 betacoronaviruses lineages already detected in humans have especially high host generalism  
361 and transmission rates, indicating that these lineages should be particularly monitored to avoid  
362 future pandemics.

363  
364 Finally, a few important limitations of our analyses deserve to be mentioned.  
365 Recombination is an important mechanism of viral evolution (49), and approaches more  
366 adequately designed to investigate the role of recombination are needed. The fact that different  
367 subparts of the palmprint region lead to similar results indicates that recombination acting on the  
368 palmprint region is unlikely to bias our conclusions. However, looking at other genomic regions  
369 would allow gaining a more complete understanding of the role of recombination in coronavirus  
370 evolution. Lastly, because the palmprint region is a conserved region, we could not reconstruct  
371 the recent evolutionary history of coronaviruses (i.e. the within sOTU transmission dynamic):  
372 combining the palmprint region with a fast-evolving region(s) would enable more precise  
373 estimates of the recent routes of coronaviruses' transmission, including that of SARS-CoV-2.

374  
375 Understanding the evolutionary origins and diversification of viruses is crucial to any  
376 attempt of predicting new transmission routes, yet the relative frequencies of virus–host  
377 cospeciation versus cross-species transmission in the evolution of vertebrate RNA viruses  
378 remains uncertain (31). We found that coronaviruses originated in bats where they are more  
379 diverse nowadays, and later diversified in other mammal orders through preferential host  
380 switches. Spillovers from bats were rare but likely human-induced, suggesting humans are the  
381 intermediate evolutionary bridge that facilitated the spread of coronaviruses across mammals.  
382 Host switches between primates and artiodactyls, perissodactyls, and carnivorans happen at high  
383 rates and we can thus expect a spread of coronaviruses amongst new mammalian hosts and  
384 outside of their current diversity hotspots in East Asia and Europe, as well as future  
385 coronaviruses-related pandemics. Our results suggest reducing human-bat contact, for example  
386 by conserving bat habitats, as a mitigation strategy. They also suggest that cases of long-term  
387 virus–host codiversification, reported on the basis of cophylogenetic tests, have been largely  
388 over-estimated.

389

## 390 **Materials and Methods**

391

### 392 **Operational Taxonomic Units for Coronaviridae**

393 We used the 46 described species-like Operational Taxonomic Units (sOTUs) for Coronaviridae  
394 delimited using 'palmprint' sequences by (36, 37). The palmprint is a conserved amino acid (aa)



395 sub-sequence (150 aa in Coronaviridae) of central importance in the viral RdRp (36), selected for  
396 its homology across the large majority of sequences, allowing estimation of sequence divergence  
397 and phylogenetic trees (37). sOTUs were identified by Edgar et al. (36) after clustering palmp  
398 sequences at 90% amino acid identity; and released through the Serratus project. Their approach  
399 is equivalent to the species delimitation proposed by the International Committee on the  
400 Taxonomy of Viruses for Coronaviridae ((2); *SI Appendix*, Supplementary Information Text),  
401 which suggests 90% similarity of amino acid sequences for conserved domains (2, 37), and are,  
402 therefore, ideal for species tree construction. Under the 'palmp  
403 of species is applied to characterize a new OTU when a threshold of 90% amino acid identity is  
404 surpassed, serving as a useful taxonomic barcode (37). We downloaded the palmp  
405 sequences of Coronaviridae sOTUs from the Serratus project (<https://serratus.io/>; (36)) on April  
406 13 of 2022.  
407

#### 408 **Mammalian hosts of Coronaviridae**

409 All 46 sOTUs of Coronaviridae with a full palmp  
410 were screened for the identification of its hosts. From those, 35 sOTUs were associated with  
411 mammalian hosts and were kept for downstream analyses. Serratus' associated metadata was  
412 used to identify GenBank accession codes linked to each sOTU. The complete set of 90,540  
413 associated GenBank accession codes was screened to obtain the host information for each  
414 sOTU (on NCBI, Features>source>/host=). All the host species with a full Linnean name were  
415 kept as such. Accession codes with hosts leading to a generic level information were further  
416 inspected to identify the associated publication and determine the complete species name.  
417 Dubious cases or accession codes without publications had their hosts disregarded. Common  
418 names or high-level host information (e.g., host="bats") were generally eliminated except in a few  
419 cases where a domesticated species was found to be the host (i.e., host="dog", "canine" were  
420 *Canis lupus*; host="cat", "feline" were *Felis catus*; host="pig", "piglet", "newborn piglet", "sucking  
421 piglet", "porcine", "swine" were *Sus scrofa*). A final dataset of 116 mammalian hosts associated  
422 with the 35 sOTUs was assembled and used in downstream analyses. A matrix with the  
423 association between Coronaviridae sOTUs and mammalian species is available in *SI Appendix*,  
424 Dataset S1.  
425

#### 426 **Coronaviridae phylogenetic trees**

427 We constructed a Coronaviridae tree using the palmp  
428 35 sOTUs. We aligned the amino acid sequences with MAFFT (50) and trimmed them with trimAl  
429 (51). The final alignment contained 150 amino acid positions. We used two main phylogenetic  
430 software, BEAST2 (52) and PhyloBayes (53), both to assess the robustness of the tree to the  
431 phylogenetic method, and because they have different advantages (e.g. rooting and time  
432 calibration are performed in BEAST2 while PhyloBayes outputs are adapted to the  
433 cophylogenetic algorithm we used). We visualized phylogenetic trees using R (54).

434 In order to run BEAST2, we generated an input file using BEAUti with the following  
435 parameters: a WAG model with 4 classes of rates and invariant sites, a birth-death prior, and a  
436 relaxed log-normal clock. BEAST2 sampled a posterior distribution of ultrametric trees using  
437 Markov chain Monte Carlo (MCMC) with 4 independent chains each composed of 100,000,000  
438 steps sampled every 10,000 generations. We checked the convergence of the 4 chains using  
439 Tracer (55). We used LogCombiner to merge the results setting a 25% burn-in and TreeAnnotator  
440 to obtain a Maximum Clade Credibility (MCC) tree with median branch lengths. PhyloBayes was  
441 run using an LG model, 4 classes of rates, and a chain composed of 4,000 steps with a 25%  
442 burn-in.

443 To further assess the robustness of the BEAST2 tree rooting, we estimated the root  
444 position on a 46-sOTU maximum likelihood tree (from the Serratus project - (36)) assuming a

445 strict molecular clock and an ultrametric tree. We used an ultrametric setting as temporary  
446 information from the tip dates (ranging between 1999 and 2022, a neglectable difference with  
447 respect to the root age of dozens of thousands or even millions of years) was not sufficient to  
448 infer the mutation rate (we assessed the temporal signal with TempEst, (56)). We performed  
449 rooting and time-scaling with LSD2 (v2.3, (57)), assuming a tree of unknown scale (e.g. fixing all  
450 the tips dates to 1 and the root date to 0) with outlier removal and root search on all branches.  
451 LSD2 detected no outliers and positioned the root on the same branch as in the BEAST2 MCC  
452 tree (between alpha and betacoronaviruses).  
453

#### 454 **Mammalian phylogenetic tree**

455 We obtained a phylogenetic hypothesis for mammals from the consensus DNA-only tree of (58),  
456 one of the most complete and updated phylogenies for mammals. We downloaded the node-  
457 dated tree for 4,098 mammals, constructed based on a 31-gene supermatrix, from the VertLife  
458 website (<http://vertlife.org/data/mammals/>). We used a pruned version of the tree with the 116  
459 mammalian hosts of Coronaviridae in all analyses in this paper.  
460

#### 461 **Phylogenetic signal in the association between coronaviruses and mammals**

462 To assess whether closely related coronaviruses interact with similar mammals, and vice-versa,  
463 i.e. presence of phylogenetic signal in the association, we used Mantel tests following (38).  
464 Mantel tests were constructed by taking the Pearson correlation between phylogenetic distances  
465 and ecological distances. Phylogenetic distances of coronaviruses were computed on the  
466 BEAST2 MCC phylogeny. Ecological distances were calculated based on the interaction network  
467 matrix containing the association between coronavirus' sOTUs and mammals, accounting for the  
468 evolutionary relationships among interaction partners using UniFrac distances (59). Firstly, we  
469 conducted Mantel tests permuting the identity of species but keeping the number of partners per  
470 species constant; this allows for assessing the effect of species identity while controlling for the  
471 confounding effect of the number of partners. Then, we evaluated the phylogenetic signal in the  
472 number of partners alone. Lastly, we calculated clade-specific Mantel tests for sub-networks  
473 containing at least 10 species (38) to evaluate whether phylogenetic signal was stronger for  
474 specific subclades of mammals or coronaviruses. Ten thousand permutations were used in each  
475 analysis to assess significance. Analyses were conducted using the `phylosignal_network` and  
476 `phylosignal_sub_network` functions in the R package RPANDA (60).  
477

#### 478 **Coronaviridae origination and host switches**

479 We used the amalgamated likelihood estimation (ALE - (39)) to reconcile the mammal and  
480 coronaviruses evolutionary history using events of cospeciations, host switches, duplications, and  
481 losses. Originally designed in the context of gene tree – species tree reconciliations (39), ALE  
482 has also been particularly useful in the context of host-symbiont cophylogenetic analyses as it  
483 considers both phylogenetic uncertainty of the symbiont evolutionary history and undersampling  
484 of host species (35, 61, 62). ALE indeed assumes that host switches may imply an unsampled or  
485 extinct intermediate host lineage (40). We ran ALE with the posterior distribution of phylogenetic  
486 trees of coronaviruses generated with PhyloBayes to estimate the maximum likelihood rates of  
487 host switches, duplications, and losses of the coronaviruses. We first tried running the “dated”  
488 version of ALE, which accounts for the order of branching events in the host phylogeny, therefore  
489 only allowing for time-consistent host switches (i.e. host switches that happen between two  
490 contemporary host lineages). However, this led to unrealistic parameter estimates (such as very  
491 high loss rates) and ALE was not able to output possible reconciliations, suggesting that the  
492 mammalian and Coronaviridae trees are too incongruent to be reconciliated with only time-

493 consistent host switches. We therefore used the “undated” version of ALE that only exploits the  
494 topology of both the host and the symbiont tree and thus does not constrain the host switches to  
495 be time-consistent. ALE generated a total of 5,000 reconciliations, from which we extracted the  
496 mean number of cospeciations, host switches, duplications, and losses. We also reported the  
497 likely origination of coronaviruses in mammals (i.e. the branch in the mammal phylogeny that was  
498 first infected by coronaviruses) by computing, for each branch of the mammalian tree, the  
499 frequency of reconciliations (among the 5,000) that supported an origination in that branch. If a  
500 reconciliation requires more cospeciation events and fewer host switch events, than expected  
501 under a null scenario of independent evolution, this indicates that the evolution of the symbiont  
502 was not independent of that of the host, and in this case, we talk about a “significant  
503 reconciliation” (63). We evaluated the significance of the reconciliation by comparing the  
504 estimated number of cospeciation and host switch events to null expectations obtained with ALE  
505 by shuffling the mammal host species across the mammal tree, both randomly or within major  
506 biogeographic regions according to the proposal of regions by (64) for mammals (six  
507 biogeographic regions: North American, South American, African, Eurasian, Oriental, and  
508 Australian). We considered a reconciliation to be significant if the observed number of  
509 cospeciations was higher than 95% of the null expectations and if the number of host switches  
510 was lower than 95% of the null expectations (35). The likeliness of a host switch between two  
511 mammal lineages is measured as the frequency of the reconciliations in which it occurs. Finally,  
512 we reported the ratio of time-inconsistent host switches by focusing on “back-in-time” switches,  
513 from a donor mammal lineage to an older receiver mammal lineage that never coexisted.

514  
515 Because ALE estimated a large proportion of time-inconsistent host switches (see  
516 Results), we first tested the scenario of a more recent origination by collapsing all mammalian  
517 nodes anterior to X Myr into a polytomy at the root of the phylogeny (with X varying from 55 Myr  
518 to 5 Myr), such that the coronavirus origination and host switches inferred by ALE could not  
519 involve mammal lineages older than X Myr. Second, we investigated the scenario of  
520 diversification by pure preferential host switches of the coronaviruses among extant mammals. To  
521 do so, we ran ALE on a star mammalian phylogenetic tree. In this context, ALE could no longer  
522 infer cospeciations, and only fit events of host switches, duplications, or losses. When inferring a  
523 likely host switch between two specific mammalian lineages on a star phylogeny, there are often  
524 as many reconciliations suggesting one directionality of the host switch (i.e. from one of the  
525 lineages to the other) as the other. We then only kept host switches present in at least 10% of the  
526 reconciliations and looked at the ratio between the number of host switches that were estimated  
527 within versus between mammal orders. We compared this ratio to a null expectation obtained by  
528 randomly shuffling the host mammal species.

529  
530 Recombination is frequent in viruses and the palmpoint region may be recombined, such  
531 that different fragments of the palmpoint region may have different evolutionary histories,  
532 potentially biasing our inference. To test whether the results we obtained on the whole 150-amino  
533 acid palmpoint region were not impacted by recombination, we replicated the ALE analyses on  
534 two sub-regions: the first part (positions 1-75) and the last part (positions 76-150).

535  
536 Finally, we repeated our cophylogenetic analyses using eMPress (43), another event-  
537 based cophylogenetic approach that reconciliates host-symbiont evolutionary histories using  
538 maximum parsimony. eMPress is a recent improved version of the popular Jane approach (32);  
539 it differs from Jane especially by not only relying on a heuristic and therefore guarantying that the  
540 solution truly corresponds to the maximum parsimony reconciliation(s) (43). However, contrary to  
541 Jane, eMPress does not allow the same symbiont species to be present in different host species,  
542 and does not offer the possibility to constrain host switches to occur only among lineages from  
543 pre-specified time periods. eMPress requires specifying cost values for the events of host  
544 switches (t), duplications (d), and losses (l). We tested two sets of cost values: (1) cost values  
545 that disadvantage host switches (d=6, t=6, l=1) and (2) uniform cost values that favor host  
546 switches (d=1, t=1, l=1). As with ALE, we evaluated the significance of the reconciliations using

547 permutations. We ran eMPress analyses on a set of 50 trees randomly sampled from the  
548 posterior distribution of PhyloBayes.  
549

## 550 **Simulation analyses**

551 By running the undated version of ALE either on the mammal phylogeny or a star phylogeny, we  
552 proposed a framework to evaluate whether the cophylogenetic pattern is due to a history of  
553 ancient codiversification (i.e. a mix of cospeciations, host switches, duplications, and losses; Fig.  
554 1A) or to a scenario where the coronaviruses diversify more recently by preferential host switches  
555 ((34); Fig. 1B). To validate the interpretation of our ALE results, we performed simulations under  
556 the two alternative scenarios of codiversification and diversification by preferential host switches.  
557 For the scenario of codiversification, we assumed that coronaviruses originated in the ancestors  
558 of bats and that they subsequently codiversified with the mammals by experiencing events of  
559 cospeciations, host switches, duplications, and losses. We used the function *sim\_microbiota* in  
560 the R-package HOME to obtain the corresponding coronavirus sequences and coronavirus-  
561 mammals associations (65) (*SI Appendix*, Supplementary Information Text). For the scenario of  
562 coronaviruses diversification by preferential host switches, we used a birth-death model (*pmtree*  
563 function in the R-package *phytools*) to simulate a phylogenetic tree of the coronaviruses: in our  
564 model, each coronavirus lineage is associated with a single host species, a birth event  
565 corresponds to a host switch (at rate 50), while a death event corresponds to a loss of a  
566 coronavirus in a host lineage (at rate 5). We started the diversification by assuming a single  
567 coronavirus infection in *Eidolon helvum* (a bat host of external lineages within Betacoronaviruses,  
568 u25738 and u27845). Then, following de (66) and (67), we modeled preferential host switches by  
569 assuming that for a host switch from a given donor mammal species, each potential receiver  
570 species has a probability proportional to  $\exp(-0.035*d)$  where  $d$  is the phylogenetic distance  
571 between the donor and receiver species. Finally, we simulated DNA sequences of the  
572 coronavirus sequences using the function *simulate\_alignment* in HOME. For each type of  
573 simulation, we generated 50 simulated datasets of mammal-coronavirus associations. For each  
574 dataset, we ran PhyloBayes and ALE on both the mammalian phylogeny and the star phylogeny.  
575

## 576 **Geographic distribution of Coronaviridae**

577 We downloaded geographic range maps for each mammalian host species, with the exception of  
578 *Homo sapiens*, from the Map of Life website (<https://mol.org/species/>); see (68). These maps  
579 follow the taxonomy of the Mammal Diversity Database (69) supplemented with the Handbook of  
580 the Mammals of the World (HWM) database and the Alien Checklist database for invasive  
581 species (68).  
582

583 We created a world map with hexagonal, equal-area grid cells of 220km on which we  
584 mapped host and coronavirus species diversity, using the Mollweide world projection to  
585 accurately represent areas. At large spatial scales, cells with ~220km resolution return more  
586 reliable diversity estimates than smaller cells (70). We considered that a host species was  
587 present in any given cell if its range covered at least 30% of the cell area to avoid overestimating  
588 diversity. We calculated host species diversity as a simple sum of the species occurring in any  
589 given cell, and host phylogenetic diversity as Faith's phylogenetic diversity index (PD - (71)) for  
590 each cell. We mapped Coronaviridae diversity using the host-filling method (72): we constructed  
591 a range map for each Coronaviridae sOTU by overlapping the range maps of all its hosts. We  
592 consider the host filling method appropriate in this case because coronaviruses are obligatory  
593 parasites that can only live inside hosts. Next, we calculated Coronaviridae sOTU diversity by  
594 summing range maps overlapping on each cell, and Coronaviridae phylogenetic diversity as  
595 Faith's PD (71). We created these maps in R (54) using the packages *epm* (73), *sf* (74), and *ape*  
596 (75).

597

## 598 **Acknowledgments**

599 This work was performed using HPC resources from GENCI-IDRIS (Grants 2021-A0100312405  
600 and 2022- AD010313735). The authors thank B. Boussau and the Morlon lab for helpful  
601 discussions. RM thanks Campus France and the One Health/Make Our Planet Again Program for  
602 a fellowship to conduct this research.  
603

## 604 **References**

- 605 1. K. P. Alekseev, et al., Bovine-Like Coronaviruses Isolated from Four Species of Captive  
606 Wild Ruminants Are Homologous to Bovine Coronaviruses, Based on Complete Genomic  
607 Sequences. *J Virol* 82, 12422–12431 (2008).
- 608 2. R. J. de Groot, et al., Family: Coronaviridae. ICTV Ninth Report.  
609 [https://ictv.global/report\\_9th/RNApos/Nidovirales/Coronaviridae](https://ictv.global/report_9th/RNApos/Nidovirales/Coronaviridae) (2022).
- 610 3. A. M. Q. King, Adams M.J., Carstens E.B., Lefkowitz E.J., Virus taxonomy: classification  
611 and nomenclature of viruses: Ninth Report of the International Committee on Taxonomy of  
612 Viruses (Elsevier, 2012).
- 613 4. J. C. Leao, et al., Coronaviridae—Old friends, new enemy! *Oral Dis* 28, 858–866 (2022).
- 614 5. M. Wardeh, M. Baylis, M. S. C. Blagrove, Predicting mammalian hosts in which novel  
615 coronaviruses can be generated. *Nat Commun* 12 (2021).
- 616 6. C. M. Zmasek, E. J. Lefkowitz, A. Niewiadomska, R. H. Scheuermann, Genomic evolution  
617 of the Coronaviridae family. *Virology* 570, 123–133 (2022).
- 618 7. D. J. Becker, et al., Optimising predictive models to prioritise viral discovery in zoonotic  
619 reservoirs. *Lancet Microbe* 3, e625–e637 (2022).
- 620 8. C. Drosten, et al., Identification of a Novel Coronavirus in Patients with Severe Acute  
621 Respiratory Syndrome. *New England Journal of Medicine* 348, 1967–1976 (2003).
- 622 9. J. Peiris, et al., Coronavirus as a possible cause of severe acute respiratory syndrome.  
623 *The Lancet* 361, 1319–1325 (2003).
- 624 10. A. M. Zaki, S. van Boheemen, T. M. Bestebroer, A. D. M. E. Osterhaus, R. A. M.  
625 Fouchier, Isolation of a Novel Coronavirus from a Man with Pneumonia in Saudi Arabia.  
626 *New England Journal of Medicine* 367, 1814–1820 (2012).
- 627 11. P. Zhou, et al., A pneumonia outbreak associated with a new coronavirus of probable bat  
628 origin. *Nature* 579, 270–273 (2020).
- 629 12. H. Ritchie, et al., Coronavirus Pandemic (COVID-19). Published online at  
630 [OurWorldInData.org](https://www.ourworldindata.org) (2022).
- 631 13. P. C. Y. Woo, Y. Huang, S. K. P. Lau, K. Y. Yuen, Coronavirus genomics and  
632 bioinformatics analysis. *Viruses* 2, 1805–1820 (2010).
- 633 14. S. J. Anthony, et al., Global patterns in coronavirus diversity. *Virus Evol* 3 (2017).
- 634 15. N. F. R. Munoz, et al., The coevolutionary mosaic of bat betacoronavirus emergence risk.  
635 *EcoEvoRXiv* (2022).
- 636 16. Y. Guan, et al., Isolation and characterization of viruses related to the SARS coronavirus  
637 from animals in Southern China. *Science* (1979) 302, 276–278 (2003).
- 638 17. C. SMEC, Molecular Evolution of the SARS Coronavirus During the Course of the SARS  
639 Epidemic in China. *Science* (1979) 303, 1666–1669 (2004).
- 640 18. R. L. Graham, R. S. Baric, Recombination, Reservoirs, and the Modular Spike:  
641 Mechanisms of Coronavirus Cross-Species Transmission. *J Virol* 84, 3134–3146 (2010).
- 642 19. R. J. de Groot, et al., Commentary: Middle East Respiratory Syndrome Coronavirus  
643 (MERS-CoV): Announcement of the Coronavirus Study Group. *J Virol* 87, 7790–7792  
644 (2013).

- 645 20. V. M. Corman, D. Muth, D. Niemeyer, C. Drosten, “Hosts and Sources of Endemic  
646 Human Coronaviruses” in *Advances in Virus Research*, (Academic Press Inc., 2018), pp.  
647 163–188.
- 648 21. E. Mavrodiev, M. L. Tursky, S. Vincent, D. M. Williams, L. Schroder, On Classification and  
649 Taxonomy of Coronaviruses (Riboviria, Nidovirales, Coronaviridae) with Special Focus on  
650 Severe Acute Respiratory Syndrome-Related Coronavirus 2 (SARS-CoV-2) (2021)  
651 <https://doi.org/10.21203/rs.3.rs-282371/v1>.
- 652 22. P. C. Y. Woo, S. K. P. Lau, Y. Huang, K. Y. Yuen, Coronavirus diversity, phylogeny and  
653 interspecies jumping. *Exp Biol Med* 234, 1117–1127 (2009).
- 654 23. P. C. Y. Woo, et al., Discovery of Seven Novel Mammalian and Avian Coronaviruses in  
655 the Genus Deltacoronavirus Supports Bat Coronaviruses as the Gene Source of  
656 Alphacoronavirus and Betacoronavirus and Avian Coronaviruses as the Gene Source of  
657 Gammacoronavirus and Deltacoronavirus. *J Virol* 86, 3995–4008 (2012).
- 658 24. D. Vijaykrishna, et al., Evolutionary Insights into the Ecology of Coronaviruses. *J Virol* 81,  
659 4012–4020 (2007).
- 660 25. A. J. Drummond, S. Y. W. Ho, M. J. Phillips, A. Rambaut, Relaxed Phylogenetics and  
661 Dating with Confidence. *PLoS Biol* 4, e88 (2006).
- 662 26. J. O. Wertheim, D. K. W. Chu, J. S. M. Peiris, S. L. Kosakovsky Pond, L. L. M. Poon, A  
663 Case for the Ancient Origin of Coronaviruses. *J Virol* 87, 7039–7045 (2013).
- 664 27. J. O. Wertheim, S. L. Kosakovsky Pond, Purifying selection can obscure the ancient age  
665 of viral lineages. *Mol Biol Evol* 28, 3355–3365 (2011).
- 666 28. D. T. S. Hayman, M. A. Knox, Estimating the age of the subfamily Orthocoronavirinae  
667 using host divergence times as calibration ages at two internal nodes. *Virology* 563, 20–  
668 27 (2021).
- 669 29. S. Duchêne, E. C. Holmes, S. Y. W. Ho, Analyses of evolutionary dynamics in viruses  
670 are hindered by a time-dependent bias in rate estimates. *Proceedings of the Royal  
671 Society B: Biological Sciences* 281, 20140732 (2014).
- 672 30. A. Katzourakis, R. J. Gifford, Endogenous Viral Elements in Animal Genomes. *PLoS  
673 Genet* 6, e1001191 (2010).
- 674 31. M. Shi, et al., The evolutionary history of vertebrate RNA viruses. *Nature* 556, 197–202  
675 (2018).
- 676 32. C. Conow, D. Fielder, Y. Ovidia, R. Libeskind-Hadas, Jane: A new tool for the  
677 cophylogeny reconstruction problem. *Algorithms for Molecular Biology* 5 (2010).
- 678 33. Y.-Z. Zhang, W.-C. Wu, M. Shi, E. C. Holmes, The diversity, evolution and origins of  
679 vertebrate RNA viruses. *Curr Opin Virol* 31, 9–16 (2018).
- 680 34. D. M. de Vienne, et al., Cospeciation vs host-shift speciation: methods for testing,  
681 evidence from natural associations and relation to coevolution. *New Phytologist* 198, 347–  
682 385 (2013).
- 683 35. B. Perez-Lamarque, H. Morlon, Comparing different computational approaches for  
684 detecting long-term vertical transmission in host-associated microbiota in *Molecular  
685 Ecology*, (John Wiley and Sons Inc, 2022) <https://doi.org/10.1111/mec.16681>.
- 686 36. R. C. Edgar, et al., Petabase-scale sequence alignment catalyses viral discovery. *Nature*  
687 602, 142–147 (2022).
- 688 37. A. Babaian, R. Edgar, Ribovirus classification by a polymerase barcode sequence. *PeerJ*  
689 10 (2022).
- 690 38. B. Perez-Lamarque, et al., Do closely related species interact with similar partners?  
691 Testing for phylogenetic signal in bipartite interaction networks. *Peer Community Journal*  
692 2, XX (2022).
- 693 39. G. J. Szöllosi, W. Rosikiewicz, B. Boussau, E. Tannier, V. Daubin, Efficient exploration of  
694 the space of reconciled gene trees. *Syst Biol* 62, 901–912 (2013).
- 695 40. G. J. Szöllosi, E. Tannier, N. Lartillot, V. Daubin, Lateral gene transfer from the dead.  
696 *Syst Biol* 62, 386–397 (2013).
- 697 41. G. Dudas, L. M. Carvalho, A. Rambaut, T. Bedford, MERS-CoV spillover at the camel-  
698 human interface. *Elife* 7 (2018).

- 699 42. C. Wei, et al., Evidence for a mouse origin of the SARS-CoV-2 Omicron variant. *Journal*  
700 *of Genetics and Genomics* 48, 1111–1121 (2021).
- 701 43. S. Santichaivekin, et al., eMPress: a systematic cophylogeny reconciliation tool.  
702 *Bioinformatics* 37, 2481–2482 (2021).
- 703 44. C. C. S. Tan, et al., Transmission of SARS-CoV-2 from humans to animals and potential  
704 host adaptation. *Nat Commun* 13 (2022).
- 705 45. N. M. Furey, P. A. Racey, “Conservation Ecology of Cave Bats” in *Bats in the*  
706 *Anthropocene: Conservation of Bats in a Changing World*, (Springer International  
707 Publishing, 2016), pp. 463–500.
- 708 46. T. Mildenstein, I. Tanshi, P. A. Racey, “Exploitation of Bats for Bushmeat and Medicine”  
709 in *Bats in the Anthropocene: Conservation of Bats in a Changing World*, (Springer  
710 International Publishing, 2016), pp. 325–375.
- 711 47. I. Smith, L. F. Wang, Bats and their virome: An important source of emerging viruses  
712 capable of infecting humans. *Curr Opin Virol* 3, 84–91 (2013).
- 713 48. S. Leopardi, et al., Interplay between co-divergence and cross-species transmission in  
714 the evolutionary history of bat coronaviruses. *Infection, Genetics and Evolution* 58, 279–  
715 289 (2018).
- 716 49. M. Pérez-Losada, M. Arenas, J. C. Galán, F. Palero, F. González-Candelas,  
717 Recombination in viruses: Mechanisms, methods of study, and evolutionary  
718 consequences. *Infection, Genetics and Evolution* 30, 296–307 (2015).
- 719 50. K. Katoh, D. M. Standley, MAFFT Multiple Sequence Alignment Software Version 7:  
720 Improvements in Performance and Usability. *Mol Biol Evol* 30, 772–780 (2013).
- 721 51. S. Capella-Gutiérrez, J. M. Silla-Martínez, T. Gabaldón, trimAl: a tool for automated  
722 alignment trimming in large-scale phylogenetic analyses. *Bioinformatics* 25, 1972–1973  
723 (2009).
- 724 52. R. Bouckaert, et al., BEAST 2: A Software Platform for Bayesian Evolutionary Analysis.  
725 *PLoS Comput Biol* 10, e1003537 (2014).
- 726 53. N. Lartillot, H. Philippe, A Bayesian Mixture Model for Across-Site Heterogeneities in the  
727 Amino-Acid Replacement Process. *Mol Biol Evol* 21, 1095–1109 (2004).
- 728 54. R Core Team, R: a language and environment for statistical computing (2018).
- 729 55. A. Rambaut, A. J. Drummond, D. Xie, G. Baele, M. A. Suchard, Posterior Summarization  
730 in Bayesian Phylogenetics Using Tracer 1.7. *Syst Biol* 67, 901–904 (2018).
- 731 56. A. Rambaut, T. T. Lam, L. Max Carvalho, O. G. Pybus, Exploring the temporal structure  
732 of heterochronous sequences using TempEst (formerly Path-O-Gen). *Virus Evol* 2,  
733 vew007 (2016).
- 734 57. T.-H. To, M. Jung, S. Lycett, O. Gascuel, Fast Dating Using Least-Squares Criteria and  
735 Algorithms. *Syst Biol* 65, 82–97 (2016).
- 736 58. N. S. Upham, J. A. Esselstyn, W. Jetz, Inferring the mammal tree: Species-level sets of  
737 phylogenies for questions in ecology, evolution, and conservation. *PLoS Biol* 17 (2019).
- 738 59. J. Chen, et al., Associating microbiome composition with environmental covariates using  
739 generalized UniFrac distances. *Bioinformatics* 28, 2106–2113 (2012).
- 740 60. H. Morlon, et al., RPANDA: an R package for macroevolutionary analyses on  
741 phylogenetic trees. *Methods Ecol Evol* 7, 589–597 (2016).
- 742 61. M. Groussin, et al., Unraveling the processes shaping mammalian gut microbiomes over  
743 evolutionary time. *Nat Commun* 8 (2017).
- 744 62. M. Bailly-Bechet, et al., How Long Does *Wolbachia* Remain on Board? *Mol Biol Evol* 34,  
745 1183–1193 (2017).
- 746 63. R. G. Dorrell, et al., Phylogenomic fingerprinting of tempo and functions of horizontal  
747 gene transfer within ochrophytes [https://doi.org/10.1073/pnas.2009974118/-](https://doi.org/10.1073/pnas.2009974118/)  
748 /DCSupplemental.
- 749 64. C. Barry Cox, The biogeographic regions reconsidered. *J Biogeogr* 28, 511–523 (2001).
- 750 65. B. Perez-Lamarque, H. Morlon, Characterizing symbiont inheritance during host–  
751 microbiota evolution: Application to the great apes gut microbiota. *Mol Ecol Resour* 19,  
752 1659–1671 (2019).

- 753 66. D. M., de Vienne, T. Giraud, J. A. Shykoff, When can host shifts produce congruent host  
754 and parasite phylogenies? A simulation approach. *J Evol Biol* 20, 1428–1438 (2007).
- 755 67. B. Perez-Lamarque, H. Krehenwinkel, R. G. Gillespie, H. Morlon, Limited evidence for  
756 microbial transmission in the phyllosymbiosis between Hawaiian spiders and their  
757 microbiota. *mSystems* 7, e01104-21 (2022).
- 758 68. C. J. Marsh, et al., Expert range maps of global mammal distributions harmonised to  
759 three taxonomic authorities. *J Biogeogr* 49, 979–992 (2022).
- 760 69. C. J. Burgin, J. P. Colella, P. L. Kahn, N. S. Upham, How many species of mammals are  
761 there? *J Mammal* 99, 1-14 (2018).
- 762 70. A. H. Hurlbert, W. Jetz, Species richness, hotspots, and the scale dependence of range  
763 maps in ecology and conservation. *PNAS* 104, 13384-13389 (2007).
- 764 71. D. P. Faith, Conservation evaluation and phylogenetic diversity. *Biol Cons* 61, 1-10  
765 (1992).
- 766 72. P. Pappalardo, et al., Comparing methods for mapping global parasite diversity. *Global  
767 Ecol Biogeogr* 29, 182-193 (2019).
- 768 73. P. O. Title, D. L. Swiderski, M. L. Zelditch, EcoPhyloMapper: an R package for integrating  
769 geographical ranges, phylogeny and morphology. *Methods Ecol Evol* 13, 1912-1922  
770 (2022).
- 771 74. E. Pebesma, Simple features for R: standardized support for spatial vector data. *The R  
772 Journal* 10, 439-446 (2018).
- 773 75. E. Paradis, K. Schliep, ape 5.0: an environment for modern phylogenetics and  
774 evolutionary analyses in R. *Bioinformatics* 35, 526-528 (2019).
- 775



776 **Figures and Tables**

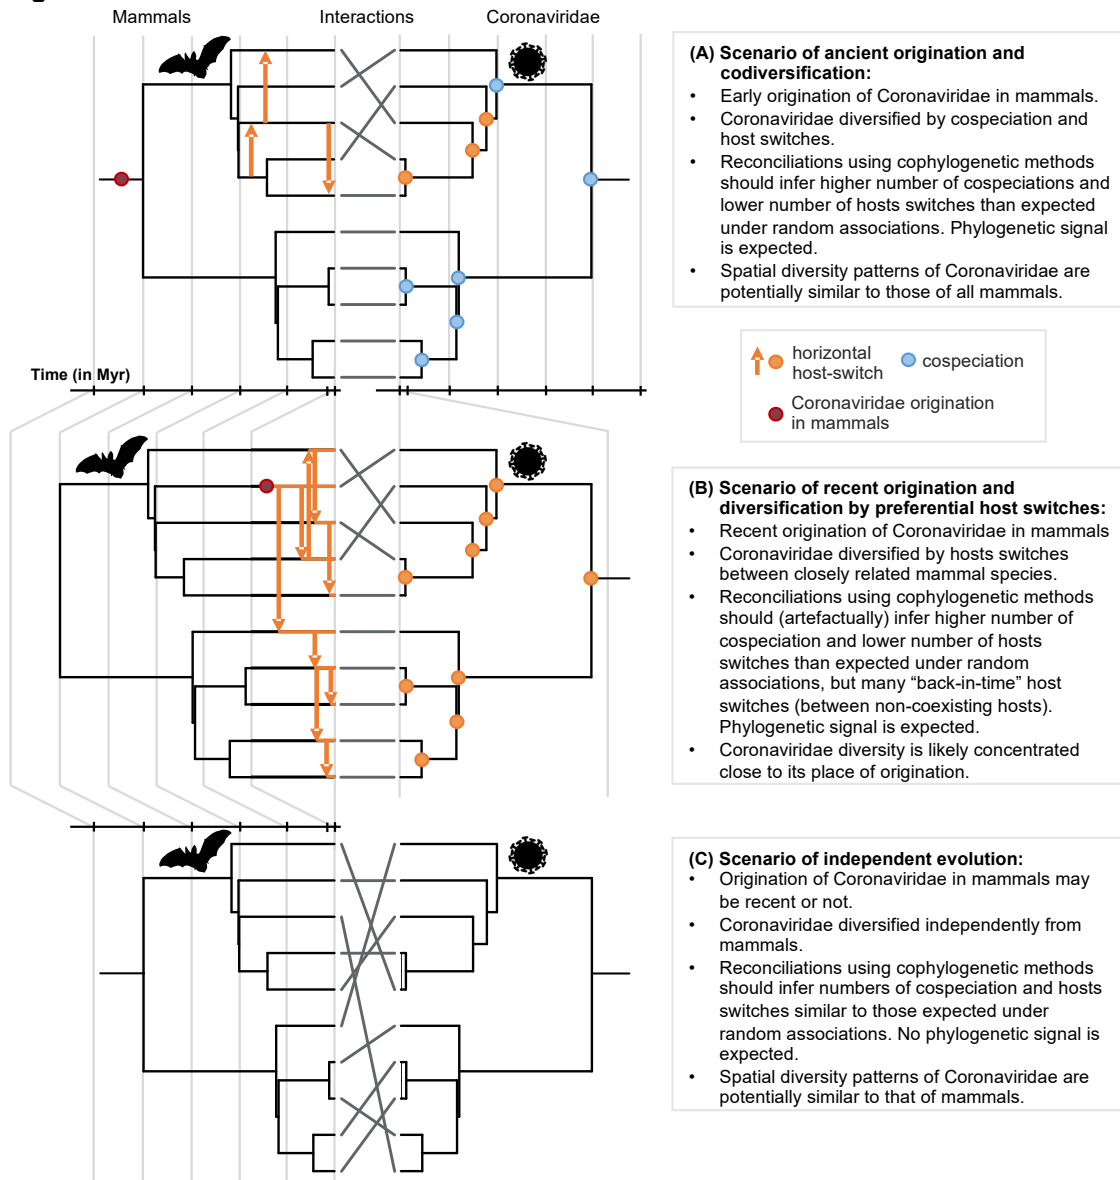

777  
778  
779  
780  
781  
782  
783  
784  
785  
786  
787  
788  
789  
790  
791  
792

**Figure 1. A framework for testing scenarios of virus-host evolution, illustrated with the example of Coronaviridae and their mammalian hosts:** In (A), a scenario of ancient origination and codiversification; in (B) a scenario of recent origination and diversification by preferential host switches; and in (C) a scenario of independent evolution. For each scenario, we indicate the associated predictions in the grey boxes. Contrary to scenario C, both scenarios A and B are expected to generate a cophylogenetic signal, *i.e.* closely-related coronaviruses tend to infect closely-related mammals, resulting in significant reconciliations when using topology-based probabilistic cophylogenetic methods, such as the undated version of ALE (Szollosi et al 2013), Jane (Conow et al 2010), or eMPress (Sanitchavekin et al, 2021). However, we expect scenario B to be distinguishable from scenario A in terms of the time consistency of host-switching events. Under scenario B, cophylogenetic methods wrongly estimate a combination of cospeciations and “back-in-time” host switches (see Methods & Results). We also expect different biogeographic patterns under the different scenarios.

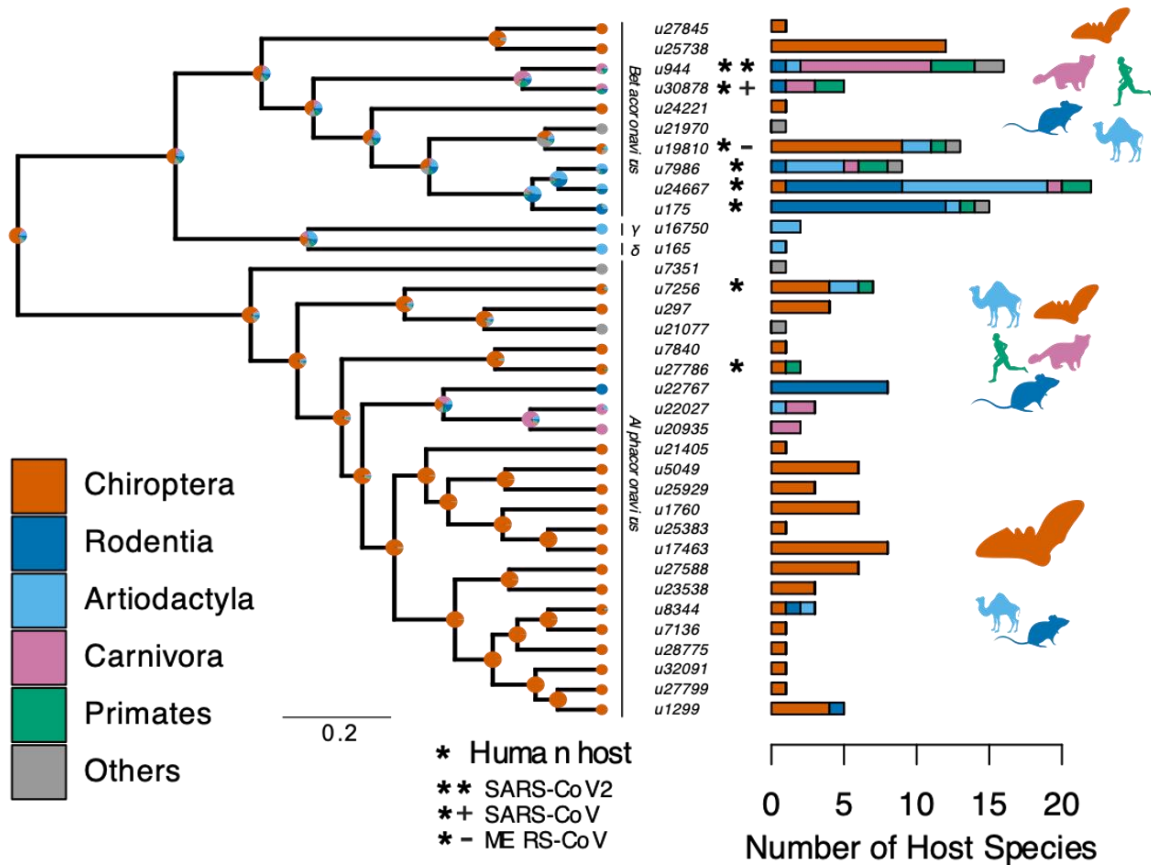

793

794 **Figure 2. Species-level relationships among coronaviruses and their associated**  
 795 **mammalian hosts.** A consensus Maximum Clade Credibility phylogenetic tree of coronaviruses  
 796 is shown on the left. The tree was constructed with BEAST2 based on 150-aa palmprint amino  
 797 acid sequences of the RdRp gene. sOTUs of Coronaviridae followed the definition of the Serratus  
 798 project. The putative location of four genera of coronaviruses, Beta, Gamma, Delta, and  
 799 Alphacoronaviruses, is shown. Bar scale is in units of aa substitution. On the right, a barplot gives  
 800 the number of total mammalian host species and the number of host species by main mammalian  
 801 order. Ancestral states on the left were obtained for illustrative purposes with the `make.simmmap`  
 802 function of the `phytools` R package (Revell 2012). Mammal silhouettes taken from open-to-use  
 803 sources in `phylopic.org`, detailed credits given in SI Appendix Table S6.

804

805

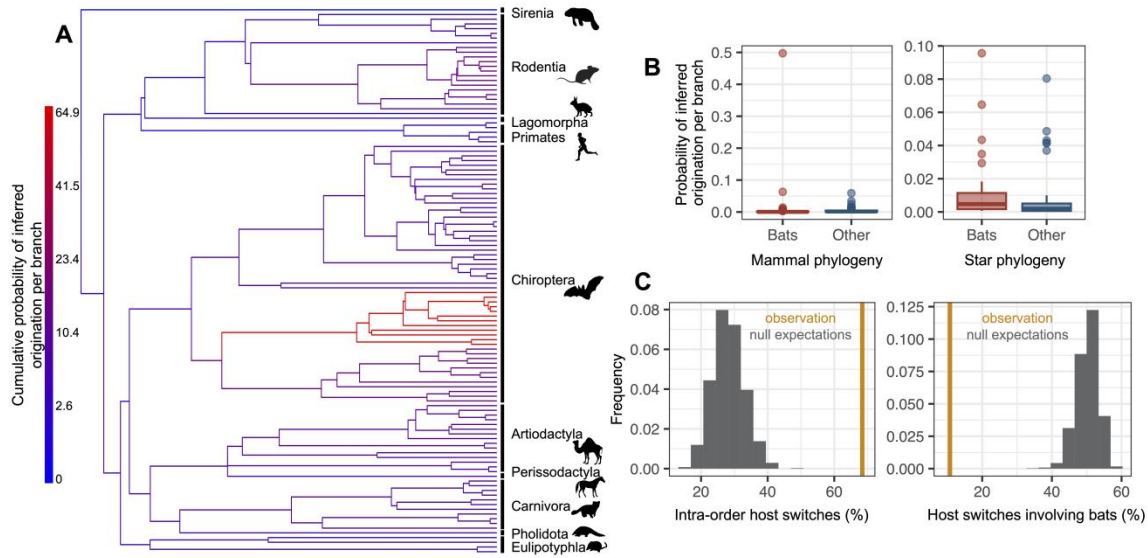

806

807 **Figure 3. The origination of coronaviruses in mammals is estimated among bats, which**  
808 **tend to form a closed reservoir.** (A) Phylogenetic tree of the mammals with branches colored  
809 as the percentage of ALE reconciliations which inferred this branch or its ancestral lineages as  
810 the origination of coronaviruses in mammals. Red branches are likely originations, whereas blue  
811 branches are unlikely. (B) Boxplots recapitulating the probability of inferred origination per branch  
812 in bats *versus* other mammal orders, with ALE applied on the original mammal tree (left panel) or  
813 on the mammal tree transformed into a star phylogeny (right panel), therefore assuming an  
814 origination in extant species. (C) Distributions of the percentages of host switches occurring  
815 within mammalian orders (left panel) and between-orders involving bats (right panel). Observed  
816 values (in orange) are compared to null expectations if host switches were happening at random  
817 (in grey). Mammal silhouettes taken from open-to-use sources in phylopic.org, detailed credits  
818 given in SI Appendix Table S6.

819

820

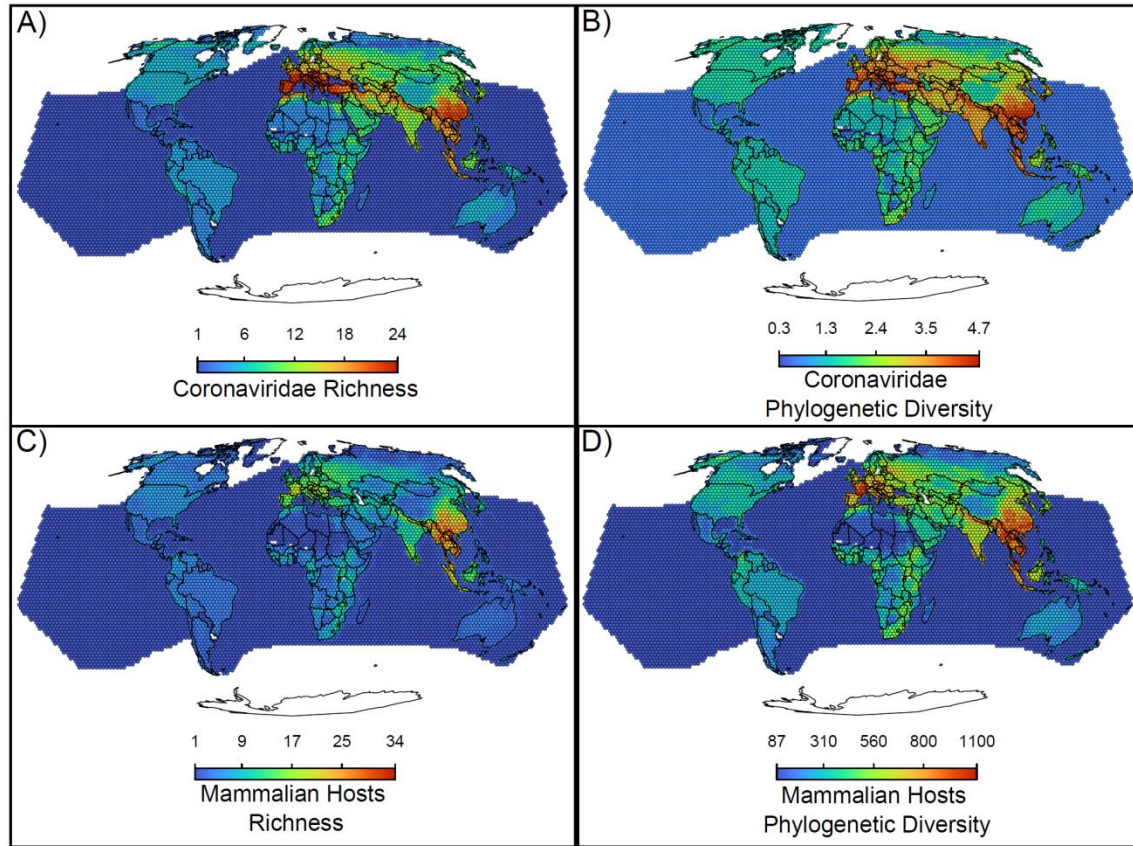

821

822

823

824

825

826

827

828

829

830

**Figure 4. Maps of the diversity of coronaviruses and their mammalian hosts.** In A) the richness of species of coronaviruses; geographic range maps of coronaviruses were constructed after applying the host-filling method on the geographic range maps of mammalian hosts of coronaviruses. In B) Faith's (1992) phylogenetic diversity of coronaviruses, calculated using the phylogenetic tree of coronaviruses (see main text). In C) and D), the richness and phylogenetic diversity of mammalian hosts of coronaviruses, respectively. All maps are on the Mollweide projection.
